# Supplementary material for: Stable photoinduced charge separation in heptacene
Source: Royal Society of Chemistry journal article supplement (doi:10.1039/b713059g), 2007-01-01
Supplement: b713059g.pdf [file b713059g.pdf]

## **SUPPORTING INFORMATION**

### **Stable photoinduced charge separation in heptacene**

Holger F. Bettinger,\* Rajib Mondal, Douglas C. Neckers

Lehrstuhl für Organische Chemie II, Ruhr-Universität Bochum, Universitätsstraße 150, 44780

Bochum, Germany

Fax: +49 234-321-4353

e-Mail: Holger.Bettinger@rub.de

Center for Photochemical Sciences, Bowling Green State University, Bowling Green, OH  
43403, USA

## Experimental and Computational Details

The  $\alpha$ -diketone **2** was synthesized as described previously.<sup>[1]</sup> Matrix experiments were carried out according to standard techniques<sup>[2]</sup> with APD CSW-20 dispex closed-cycle helium cryostats. The photoprecursor **2** was sublimed out of a quartz tube, which was resistively heated to 220–227 °C by Ta wire coiled around it, onto cold CsI (IR experiments) or sapphire windows with a large excess of argon, nitrogen (both Messer Griesheim, 99.9999%), or xenon (Air Liquide, 4.0), which were dosed to 2.0 sccm by a mass flow controller (MKS Mass Flo Type 247 four-channel read out). The windows were kept at 30 K, 28 K, or 55 K during deposition of argon, nitrogen, or xenon, respectively by resistive heating using an Oxford ITC 503 temperature controller. IR spectra were measured on Bruker IFS 66 and IFS 66/S spectrometers using a resolution of 0.5 cm<sup>-1</sup>, while electronic spectra were measured using a Cary 5000 spectrometer.

The computational investigations used the B3LYP<sup>[3, 4]</sup> hybrid functional as implemented in Gaussian<sup>[5]</sup> for the optimization of the geometry and computation of harmonic vibrational frequencies of heptacene and its singly charged radical ions in conjunction with the 6-31G\* basis set. All B3LYP computations were performed with Gaussian 03.<sup>[5]</sup> Electronic excitations of heptacene were computed using the RICC2<sup>[6, 7]</sup> method in conjunction with the TZVP<sup>[8]</sup> basis set employing the Turbomole<sup>[9]</sup> program. For the radical ions, time-dependent B3LYP was used in conjunction with the 6-31G\* basis set for obtaining excitation energies, as the D<sub>1</sub> values of CC2 theory were unacceptably large (>0.08).

### IR Spectral Data of Heptacene

Table S1. Mid-IR spectroscopic data of heptacene measured in an argon matrix at 15 K. For comparison theoretical data obtained at the RB3LYP/6-31G\* level of theory is given. Due to the large number of IR active modes only those having a computed relative intensity larger than 5% are given.

| Symmetry        | Mode Number | $\nu_{\text{exp}}/\text{cm}^{-1}$ | rel. Intensity/%             | $\omega_{\text{heor}}/\text{cm}^{-1}$ | rel. Intensity/%   |
|-----------------|-------------|-----------------------------------|------------------------------|---------------------------------------|--------------------|
| B <sub>2u</sub> | 137         | 3085, 3054, 3039 <sup>a</sup>     | combined: 116.3 <sup>a</sup> | 3209.6                                | 113.5              |
| B <sub>1u</sub> | 136         |                                   |                              | 3197.3                                | 59.3               |
| B <sub>2u</sub> | 133         |                                   |                              | 3183.6                                | 12.8               |
| B <sub>1u</sub> | 131         |                                   |                              | 3180.5                                | 65.8               |
| B <sub>2u</sub> | 130         |                                   |                              | 3179.8                                | 6.8                |
| B <sub>1u</sub> | 119         |                                   |                              |                                       | 1689.8             |
| B <sub>2u</sub> | 95          | 1319                              | 5.1                          | 1362.5                                | 8.9                |
| B <sub>1u</sub> | 93          | 1309                              | 13.1                         | 1333.4                                | 46.7               |
| B <sub>1u</sub> | 77          | 1129                              | 3.1                          | 1160.4                                | 5.6                |
| B <sub>3u</sub> | 70          | 953                               | 6.4                          | 963.5                                 | 5.6                |
| B <sub>3u</sub> | 65          | 901                               | 100.0                        | 922.1                                 | 100.0 <sup>b</sup> |
| B <sub>3u</sub> | 59          | 863                               | 6.7                          | 880.6                                 | 12.5               |
| B <sub>3u</sub> | 51          | 799                               | 4.3                          | 812.4                                 | 6.1                |
| B <sub>3u</sub> | 43          | 741, 733                          | 78.3                         | 751.5                                 | 44.5               |
| B <sub>2u</sub> | 40          |                                   |                              | 749.0                                 | 6.7                |
| B <sub>2u</sub> | 33          | 602                               | 4.7                          | 615.7                                 | 9.5                |
| B <sub>3u</sub> | 25          | 468                               | 2.6                          | 475.6                                 | 9.7                |
| B <sub>3u</sub> | 23          | 461                               | 2.7                          | 472.7                                 | 10.3               |

<sup>a</sup> The bands due to the  $\nu(\text{CH})$  stretching vibrations are broad and not resolved. The three maxima are given and the entire feature was integrated. <sup>b</sup> Absolute intensity: 127.1 km mol<sup>-1</sup>.

### UV/vis Data of Heptacene

Table S2. Tentative assignment of experimental and comparison with computed (RICC2/TZVP//B3LYP/6-31G\*) electronic transition energies and oscillator strengths  $f$  (in a.u.) for heptacene.

| State              | Experiment, Ar 10 K |                    |                            | RICC2/TZVP          |                    |       |
|--------------------|---------------------|--------------------|----------------------------|---------------------|--------------------|-------|
|                    | $\lambda/\text{nm}$ | $\omega/\text{eV}$ | $\Delta\nu/\text{cm}^{-1}$ | $\lambda/\text{nm}$ | $\omega/\text{eV}$ | $f$   |
|                    | 211                 | 5.88               | 0                          | ---                 | ---                | ---   |
| $4^1\text{B}_{2u}$ | 243                 | 5.09               | 0                          | 232                 | 5.35               | 0.003 |
| $3^1\text{B}_{2u}$ | not obs.            | not obs.           | not obs.                   | 265                 | 4.67               | 0.001 |
| $4^1\text{B}_{1u}$ | 268                 | 4.63               | 0                          | 289                 | 4.29               | 0.064 |
|                    | 320                 | 3.88               | 1705.1                     |                     |                    |       |
|                    | 326 <sup>a</sup>    | 3.80               | 1130.0                     |                     |                    |       |
|                    | 329                 | 3.77               | 850.2                      |                     |                    |       |
| $2^1\text{B}_{2u}$ | 338                 | 3.66               | 0                          | 310                 | 3.99               | 5.407 |
| $3^1\text{B}_{1u}$ | 355                 | 3.49               | 0                          | 338                 | 3.67               | 0.030 |
| $2^1\text{B}_{1u}$ | not obs.            | not obs.           | not obs.                   | 362                 | 3.42               | 0.002 |
|                    | 414                 | 2.99               | 1405.4                     |                     |                    |       |
| $1^1\text{B}_{2u}$ | 440 <sup>a</sup>    | 2.82               | 0                          | 416                 | 2.98               | 0.010 |
|                    | 601                 | 2.06               | 3632.6                     |                     |                    |       |
|                    | 610                 | 2.03               | 3403.5                     |                     |                    |       |
|                    | 657                 | 1.89               | 2222.9                     |                     |                    |       |
|                    | 670                 | 1.85               | 1919.6                     |                     |                    |       |
|                    | 690                 | 1.80               | 1485.9                     |                     |                    |       |
|                    | 704                 | 1.76               | 1202.0                     |                     |                    |       |
|                    | 728 <sup>a</sup>    | 1.70               | 735.5                      |                     |                    |       |
| $1^1\text{B}_{1u}$ | 769                 | 1.61               | 0                          | 736                 | 1.68               | 0.049 |

<sup>a</sup> Most intensive feature within a system.

### Spectral Data of Radical Ions and Tentative Assignments

Table S3. Experimental and computed (TD-UB3LYP/6-31G\*\*//UB3LYP/6-31G\*) transition wavelengths ( $\lambda$  in nm) and oscillator strengths (in a.u.) for heptacene radical ions.

| Heptacene Radical Cation, $^2\text{B}_{2g}$ |                   |        |       | Heptacene Radical Anion, $^2\text{B}_{3u}$ |          |        |       |
|---------------------------------------------|-------------------|--------|-------|--------------------------------------------|----------|--------|-------|
| State                                       | Ar, 10 K          | Theory | $f$   | State                                      | Ar, 10 K | Theory | $f$   |
|                                             | 407               |        |       |                                            |          |        |       |
|                                             | 449               |        |       |                                            |          |        |       |
|                                             | 466               |        |       |                                            |          |        |       |
| $3^2\text{B}_{3u}$                          | not obs.          | 491.4  | 0.002 | $2^2\text{B}_{1g}$                         | 472      | 466.0  | 0.151 |
| $2^2\text{A}_u$                             | 480               | 495.9  | 0.217 | $3^2\text{B}_{2g}$                         | not obs. | 474.2  | 0.001 |
| $2^2\text{B}_{3u}$                          | not obs.          | 628.9  | 0.000 | $2^2\text{B}_{2g}$                         | not obs. | 604.6  | 0.000 |
|                                             | 971               |        |       |                                            | 991      |        |       |
|                                             | 1060              |        |       |                                            |          |        |       |
|                                             | 1087              |        |       |                                            |          |        |       |
|                                             | 1117              |        |       |                                            |          |        |       |
|                                             | 1146              |        |       |                                            |          |        |       |
| $1^2\text{A}_u$                             | 1248 <sup>a</sup> | 1023.9 | 0.391 | $1^2\text{B}_{1g}$                         | 1152     | 942.2  | 0.445 |
| $1^2\text{B}_{3u}$                          | 2134              | 1908.3 | 0.009 | $1^2\text{B}_{2g}$                         | not obs. | 2101.4 | 0.009 |

<sup>a</sup> Most intense band within a system.

## References

- [1] R. Mondal, B. K. Shah, D. C. Neckers, *J. Am. Chem. Soc.* **2006**, *128*, 9612.
- [2] I. R. Dunkin, *Matrix-Isolation Techniques*, Oxford University Press, Oxford, **1998**.
- [3] A. D. Becke, *J. Chem. Phys.* **1993**, *98*, 5648.
- [4] C. Lee, W. Yang, R. G. Parr, *Phys. Rev. B* **1988**, *37*, 785.
- [5] M. J. Frisch, G. W. Trucks, H. B. Schlegel, G. E. Scuseria, M. A. Robb, J. R. Cheeseman, J. J. A. Montgomery, T. Vreven, K. N. Kudin, J. C. Burant, J. M. Millam, S. S. Iyengar, J. Tomasi, V. Barone, B. Mennucci, M. Cossi, G. Scalmani, N. Rega, G. A. Petersson, H. Nakatsuji, M. Hada, M. Ehara, K. Toyota, R. Fukuda, J. Hasegawa, M. Ishida, T. Nakajima, Y. Honda, O. Kitao, H. Nakai, M. Klene, X. Li, J. E. Knox, H. P. Hratchian, J. B. Cross, C. Adamo, J. Jaramillo, R. Gomperts, R. E. Stratmann, O. Yazyev, A. J. Austin, R. Cammi, C. Pomelli, J. W. Ochterski, P. Y. Ayala, K. Morokuma, G. A. Voth, P. Salvador, J. J. Dannenberg, V. G. Zakrzewski, S. Dapprich, A. D. Daniels, M. C. Strain, O. Farkas, D. K. Malick, A. D. Rabuck, K. Raghavachari, J. B. Foresman, J. V. Ortiz, Q. Cui, A. G. Baboul, S. Clifford, J. Cioslowski, B. B. Stefanov, G. Liu, A. Liashenko, P. Piskorz, I. Komaromi, R. L. Martin, D. J. Fox, T. Keith, M. A. Al-Laham, C. Y. Peng, A. Nanayakkara, M. Challacombe, P. M. W. Gill, B. Johnson, W. Chen, M. W. Wong, C. Gonzalez, J. A. Pople, Gaussian, Inc., Pittsburgh PA, **2003**.
- [6] C. Hättig, A. Köhn, *J. Chem. Phys.* **2002**, *117*, 6939.
- [7] C. Hättig, F. Weigend, *J. Chem. Phys.* **2000**, *113*, 5154.
- [8] A. Schäfer, C. Huber, R. Ahlrichs, *J. Chem. Phys.* **1994**, *100*, 5829.
- [9] R. Ahlrichs, M. Bär, M. Häser, H. Horn, C. Kölmel, *Chem. Phys. Lett.* **1989**, *162*, 165.
